# $\beta$ 1 integrins activate a MAPK signalling pathway in neural stem cells that contributes to their maintenance

Lia S. Campos<sup>1</sup>, Dino P. Leone<sup>2</sup>, Joao B. Relvas<sup>1,2</sup>, Cord Brakebusch<sup>3</sup>, Reinhard Fässler<sup>3</sup>, Ueli Suter<sup>2</sup> and Charles ffrench-Constant<sup>1,\*</sup>

<sup>1</sup>Departments of Medical Genetics and Pathology, University of Cambridge, Tennis Court Road, Cambridge CB2 1QP, UK

<sup>2</sup>Institute of Cell Biology, Department of Biology, Swiss Federal Institute of Technology, ETH Hönggerberg, CH-8093 Zürich, Switzerland

<sup>3</sup>Department of Molecular Medicine, Max-Planck-Institut für Biochemie, Am Klopferspitz 18a, D-82152 Martinsried, Germany

\*Author for correspondence (e-mail: cfc@mole.bio.cam.ac.uk)

Accepted 31 March 2004

Development 131, 3433-3444  
Published by The Company of Biologists 2004  
doi:10.1242/dev.01199

## Summary

The emerging evidence that stem cells develop in specialised niches highlights the potential role of environmental factors in their regulation. Here we examine the role of  $\beta$ 1 integrin/extracellular matrix interactions in neural stem cells. We find high levels of  $\beta$ 1 integrin expression in the stem-cell containing regions of the embryonic CNS, with associated expression of the laminin  $\alpha$ 2 chain. Expression levels of laminin  $\alpha$ 2 are reduced in the postnatal CNS, but a population of cells expressing high levels of  $\beta$ 1 remains. Using neurospheres – aggregate cultures, derived from single stem cells, that have a three-dimensional architecture that results in the localisation of the stem cell population around the edge of the sphere – we show directly that  $\beta$ 1 integrins are expressed at high levels

on neural stem cells and can be used for their selection. MAPK, but not PI3K, signalling is required for neural stem cell maintenance, as assessed by neurosphere formation, and inhibition or genetic ablation of  $\beta$ 1 integrin using cre/lox technology reduces the level of MAPK activity. We conclude that integrins are therefore an important part of the signalling mechanisms that control neural stem cell behaviour in specific areas of the CNS.

Supplemental data available online

Key words: Extracellular matrix, Laminin, Fibronectin, Neurosphere, Cre/lox, Stem cell niche, Ventricular zone, Subventricular zone

## Introduction

Neural stem cells are defined as cells able to undergo self-renewing divisions, and form both neurones and the two classes of glial cell in the CNS, astrocytes and myelin-forming oligodendrocytes. Studies using cell culture at clonal densities have established that these cells are present in both the embryonic (Kilpatrick and Bartlett, 1993) and the adult (Reynolds and Weiss, 1992) mouse forebrain. Although the majority of neuroepithelial cells in early embryonic development have the properties of stem cells, within the postnatal and adult CNS these cells appear to be restricted largely to the subventricular zone (SVZ) adjacent to the lateral ventricles. This zone contains two specific populations that have been suggested to act as neural stem cells: the ependymal cells (Johansson et al., 1999) and a subpopulation of astrocytes capable of giving rise to neuroblasts (Doetsch et al., 1999). A major role for these cells in the rodent is the generation of olfactory neuronal precursors that migrate along the rostral migratory stream. Studies showing increased levels of proliferation within the SVZ following demyelination injuries in adjacent white matter also suggest an important function in the generation of cells for neural repair (Nait-Oumesmar et al., 1999; Decker et al., 2002).

Although a number of the transcription factors that control neural stem cell differentiation into neurones and glia have

been identified (Kintner, 2002), the crucial mechanisms that maintain the neural stem population within the SVZ throughout life remain undefined. An important contribution to the maintenance of stem cells in other developmental systems is made by extracellular signals present in specific microenvironments or ‘niches’ (Watt and Hogan, 2000; Spradling et al., 2001). So, for example, BMPs and their analogues have been shown to maintain germline stem cells in mice (Lawson et al., 1999; Ying et al., 2000) and *Drosophila* (Xie and Spradling, 1998). The instructive potential of such extracellular signals for neural stem cells is illustrated by the finding that oligodendrocyte precursor cells can revert back to a stem cell state when exposed to appropriate growth factors (Kondo and Raff, 2000). These experiments highlight the need to identify the ‘niche’ signals within the SVZ and those cell-surface receptors present on neural stem cells that are required for their recognition.

In addition to growth factors, another potentially important class of signals are those provided by extracellular matrix (ECM) molecules recognised by integrin receptors. Integrin signalling pathways are instructive for cell migration, proliferation, differentiation and survival. These pathways interact with those downstream of growth factor receptors, so providing coordinated regulation of cell behaviour by growth factors and the ECM (Yamada and Even-Ram, 2002). Integrins

are heterodimers of two transmembrane chains,  $\alpha$  and  $\beta$ . The  $\beta$ 1 subunit is widely expressed and can heterodimerize with at least 12 different  $\alpha$  subunits, generating integrins with differing ligand specificities (Hynes, 1992). Integrins containing the  $\beta$ 1 subunit regulate epidermal stem cell maintenance (Jensen et al., 1999; Zhu et al., 1999; Raghavan et al., 2000). The higher expression of the laminin receptor  $\alpha$ 6 $\beta$ 1 has been implicated in the maintenance of mouse spermatogonial stem cells (Shinohara et al., 1999) and human embryonic stem cells (Xu et al., 2001). Together, these results suggest that integrin signalling may also play a role in neural stem cell maintenance. We have shown previously that neural precursor cell populations containing stem cells express a number of  $\beta$ 1 integrins (Jacques et al., 1998). Here we have examined the function of these  $\beta$ 1 integrins in neural stem behaviour. We have determined the distribution of  $\beta$ 1 integrins and extracellular matrix ligands within the germinal neuroepithelium during CNS development, and have used cell culture assays to demonstrate that MAPK-dependent signalling pathways downstream of these integrins contribute to neural stem cell maintenance.

## Materials and methods

### Reagents and antibodies

FGF2 was obtained from PeProtech, EGF from Calbiochem and B27 supplement from Gibco Life Technologies. All pharmacological signalling pathway inhibitors were obtained from Sigma (wortmannin) or Calbiochem (LY294002, PD98059, AG1478 and U0126/4). Monoclonal anti-integrin  $\beta$ 1 antibodies were obtained from Pharmingen (Ha2/5) and from Chemicon (MB1.2). Polyclonal antisera against  $\beta$ 1 were obtained from Chemicon or, for the double-labelling experiments with anti-nestin, as a kind gift from Professor Charles Streuli (Manchester). Antibodies against the EGF receptor were obtained from Santa Cruz and Upstate Biotechnology. MAPK and phosphorylated MAPK antibodies were purchased from New England Biolabs, and the Akt and Phospho-Akt (serine 473) were from Cell Signalling Technology. The following antibodies were used for immunohistochemistry: monoclonal anti-Nestin (Pharmingen) and anti- $\beta$ 3 tubulin (Sigma); and polyclonal anti-Fibronectin (Dako), anti-GFAP (Dako), anti-laminin 1 (Sigma), anti-laminin  $\alpha$ 2 chain (Santa Cruz) rabbit antisera and anti phospho-histone H3 rabbit antisera (Upstate Biotech). All fluorescent secondary antibodies were obtained from Jackson Immunochemicals. TUNEL was performed using the Apoptag kit from Intergen.

### Neurosphere culture preparation

Primary cultures were prepared from newborn rats and mice (postnatal day 0-2; P0-P2) (Jacques et al., 1998). Briefly, spheres of neural precursors were grown in EGF or FGF2 (20 ng/ml) from dissociated P0-P2 rat forebrain in DMEM/Hams-F12 supplemented with B27 (Reynolds and Weiss, 1992; Svendsen et al., 1995). The culture media was changed every 3 days.

### Western blots

For protein expression analysis neurospheres were lysed in lysis buffer (10 mM Tris-HCl, 5 mM EDTA, 150 mM NaCl buffer and 1% Triton X-100) containing proteases and phosphatase inhibitors (5  $\mu$ g/ml leupeptin, 2  $\mu$ g/ml aprotinin, 2 mM PMSF, 1  $\mu$ g/ml pepstatin, 2 mM sodium fluoride, 2 mM sodium vanadate; all from Sigma). The supernatant was clarified by centrifugation at 16,000 g for 20 minutes at 4°C. Protein concentrations in the supernatant were determined using a Bio-Rad protein assay, with BSA as a standard. For western blotting, 20  $\mu$ g of protein was loaded in each

condition. Proteins were separated by SDS-PAGE and electroblotted onto nitrocellulose membranes (Hybond-C, Pharmacia). Membranes were blocked in 10% non-fat dry milk in Tris-buffered saline (TBS) for 1 hour at room temperature. Blots were then incubated with the primary antibodies overnight at 4°C in milk-TBS containing 0.1% Tween-20 (TBS-T), followed by a 2 hour incubation with the appropriate secondary peroxidase-conjugated antibody (Amersham). To visualize the immunoreactive proteins the ECL kit was used, following the manufacturer's instructions (Amersham).

### Fluorescence activated cell sorting (FACS) of neural stem cells

Neurospheres were dissociated and incubated with the FITC-conjugated Ha2/5 monoclonal antibody (Pharmingen) in PBS at 4°C for 30 minutes; this antibody was used previously to study  $\beta$ 1 expression levels in fetal liver cells (Suzuki et al., 2000). Control cells were incubated in PBS only. The cells were then counter-stained with propidium iodide (5  $\mu$ g/ml, Sigma) for live/dead discrimination and sorted through a MoFlow (Cytomation). Non-FITC fluorescent cells were excluded from the sorting. Amongst the fluorescent cells (of either EGF- or FGF2-grown neurospheres) we defined two groups: a group of very strongly fluorescent cells and a group of cells with intermediate levels of labelling. The same number of events was then sorted from each population. Five thousand cells were deposited in each well of a 24-well plate. The cells isolated by FACS were then grown for a week in the appropriate medium and the number of secondary neurospheres formed for each condition was counted. These experiments were done five times for EGF- and four times for FGF2-grown neurospheres. Statistical significance was determined using Student's *t*-test.

### Serial dilution assays

Neurospheres were completely dissociated, and 4000 cells were resuspended in 400  $\mu$ l of culture media with EGF or FGF2. Dilution assays were set up on 96-well plates (Iwaki) as follows: 200  $\mu$ l of the initial 400  $\mu$ l containing the 4000 cells was transferred to the adjacent well, which already contained 200  $\mu$ l of media. From this second well another 200  $\mu$ l was collected and transferred. This operation was repeated for all the wells in each line creating a range of cell concentrations from 2000 (first well) to 1-2 cells (twelfth well). Each individual experiment was performed in triplicate, with the exception of the experiments using U0126/4 which were performed in duplicate. Serial dilutions were set up in the presence of the EGF receptor inhibitor AG1478 (20  $\mu$ M), MAPK inhibitors (PD98059, 50  $\mu$ M; U0126/4, 100  $\mu$ M), the p38 MAPK inhibitor SB203580 (50  $\mu$ M) and PI3K inhibitors (wortmannin, 50 nM; LY294002, 2.5  $\mu$ M). After one week, the newly formed neurospheres were counted in each well and plotted against the initial number of cells per well. The resulting slope of the line was used to compare the different experimental conditions. Statistical analysis of the slopes of the regression lines was performed using Student's *t*-test.

### Conditional knock-out of $\beta$ 1 in neurospheres

Neurospheres were prepared from P0 mice bred to have either the floxed  $\beta$ 1/null or floxed  $\beta$ 1/wild-type (wt) phenotype (by crossing mice carrying the floxed allele with those heterozygous for a null allele of  $\beta$ 1), and were grown in both EGF and FGF2 (20 ng/ml). The floxed  $\beta$ 1 allele was generated as previously described (Brakebusch et al., 2000). After 10 days in culture, the neurospheres were dissociated, cells were infected with an adenoviral vector expressing cre recombinase (Kalamarides et al., 2002) (a kind gift from Dr Marco Giovannini, INSERM U434, Paris) and then replated in the same growth factors. The culture medium was changed after 3 days to medium without adenovirus. Recombination was confirmed by the expression of  $\beta$ -galactosidase in the newly-formed neurospheres, as excision of the  $\beta$ 1 gene activates a *lacZ* reporter

gene in the floxed allele. The number of entirely blue neurospheres formed by the floxed  $\beta 1$ /null was then compared with the number of entirely blue neurospheres made by the control floxed  $\beta 1$ /wt for an equal number of plated cells (3000 cells/well of a 24-well plate). Neurospheres in which excision had not occurred or was incomplete (as evidenced by cells not expressing  $\beta$ -galactosidase) were not included in the assay. For the experiments analysing MAPK phosphorylation, neurospheres generated from floxed  $\beta 1$ /null or floxed  $\beta 1$ /wt cells were passaged at least ten times and then incubated overnight in the EGF receptor inhibitor AG1478 (20  $\mu$ M), in the presence of 20 ng/ml EGF and FGF2. The spheres were then lysed as above and western blot analysis performed using MAPK and phosphorylated MAPK antibodies, as described above. Equal loading was confirmed by protein quantification. The gels were scanned and quantified using the NIH Image 1.62 software, with the ratio of the band intensities of total MAPK and phosphorylated MAPK calculated for each neurosphere cell line, with and without the inhibitor. Three cell lines of each genotype were analysed. All samples were run on a single gel and processed simultaneously, with the total MAPK analysis performed by stripping the membrane after the P-MAPK analysis. Student's *t*-test was used to compare the ratio of band intensities following exposure to AG1478 in both of the two genotypes.

### Immunohistochemistry and cell counts

For proliferation assays BrdU was added to the culture media (10-20  $\mu$ mol/l) 30 minutes, 3 hours or 24 hours before fixation. Neurospheres and neonatal or embryonic brain tissue were then fixed in 2-4% paraformaldehyde in PBS (phosphate buffered saline). The samples were then transferred to a 25% solution of sucrose (w/v) and left overnight at 4°C. Cryostat sections (14  $\mu$ m) were prepared from imbedded brains or neurospheres (TissueTek-Sakura) and used for immunohistochemistry. Sections were blocked in PBS (0.1% Triton X-100) containing normal goat serum and incubated overnight with the appropriate antibodies at 4°C. After incubation with the appropriate secondary antibodies and counter-staining with DAPI, pictures were acquired using a Zeiss fluorescence microscope equipped with a Hamamatsu Orca camera. Images were processed using Open Lab (Improvision).

## Results

### $\beta 1$ integrin and ECM expression in germinal neuroepithelium

Previous studies have shown that stem cells in human skin can be identified by their high levels of  $\beta 1$  integrin expression, as compared with the transit-amplifying keratinocyte precursor cell population (Jensen et al., 1999). To determine whether neural stem cells also express high levels of  $\beta 1$  integrin, we examined the ventricular (germinal) region in embryonic and new-born mouse and rat (Fig. 1). At E12.5 in the mouse (Fig. 1A,B,E),  $\beta 1$  and  $\alpha 6$  integrins were expressed throughout this region, with the highest levels immediately adjacent to the ventricle. Similar results were seen in the embryonic rat (data not shown). In postnatal animals, however, only a subpopulation of cells was strongly labelled by antibodies against  $\beta 1$  integrin (Fig. 1L,O). These cells were only present in the lateral wall of the ventricle, and no labelling was seen in the medial wall (Fig. 1O). The cells had an elongated morphology perpendicular to the ventricular surface. Experiments using antibodies against phosphorylated histone-H3 showed mitotic cells within the region expressing high levels of  $\beta 1$  in the E12.5 embryonic mouse ventricular zone (Fig. 1C), with double-labelling showing  $\beta 1$  expression directly on these cells (Fig. 1D-G). Double-labelling

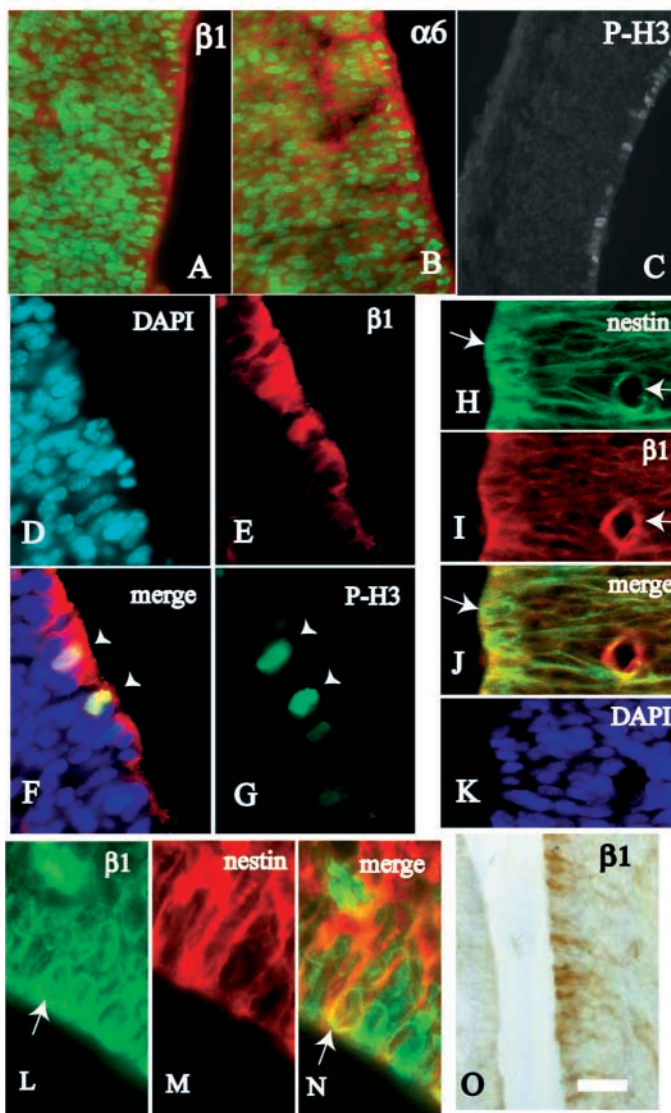

**Fig. 1.**  $\beta 1$  expression in the mouse and rat germinal neuroepithelium. (A-C) Expression of  $\beta 1$  (A, red) and  $\alpha 6$  (B, red) in the the E12.5 mouse VZ. Proliferative cells are revealed in C by labelling with an antibody against phosphorylated histone H3 (P-H3). Note that these cells are seen immediately adjacent to the ventricle, in the region where  $\beta 1$  expression is highest. Nuclei in A and B (green) are counterstained with DAPI. (D-G) Proliferation of the  $\beta 1$ -expressing cells is shown directly in a section double labelled for P-H3 (green) and  $\beta 1$  (red). Nuclei are shown counterstained with DAPI in D (blue), and a merged image is shown in F. (H-K) E12.5 mouse VZ cells adjacent to the ventricle and expressing high levels of  $\beta 1$  (I) also express nestin (H, merged in J with DAPI shown in K). Note the extensive double labelling, whereas the developing blood vessel (arrowed) labels much more weakly with the anti-nestin antibody. (L-N) Some of the  $\beta 1^+$  cells observed two days after birth (P2) in the mouse VZ/SVZ (L) double label with nestin (M, merged image shown in N, arrow). (O) At P2  $\beta 1^+$  cells are also prominent in the lateral wall of the ventricle in the rat. Note the elongated morphology and the lack of labelling in the medial wall. All sections are coronal. Scale bar: 15  $\mu$ m in D-G,L-N; 20  $\mu$ m in H-K,O; 25  $\mu$ m in A,B; 30  $\mu$ m in C.

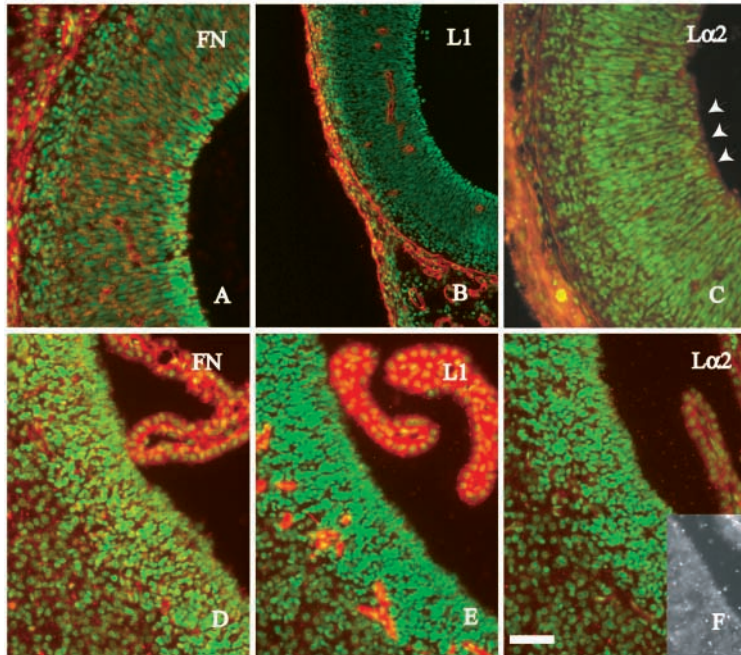

**Fig. 2.** Expression of fibronectin, laminin 1 (L1) and laminin  $\alpha 2$  chain (L $\alpha 2$ ) in the rat VZ/SVZ. In the rat at E15.5, fibronectin is expressed in a speckled pattern throughout the developing cortex (A), L1 is found around the blood vessels and on the pial surface (B) and laminin  $\alpha 2$  shows a condensation in the VZ (C, arrowheads). In the P2 rat brain, fibronectin can be found (D) in the VZ/SVZ, whereas L1 is present only around blood vessels (E) and L $\alpha 2$  levels are extremely low (F and inset). L1, L $\alpha 2$  and fibronectin are shown in red, and DAPI-counterstained nuclei are shown in green. All sections are coronal. Scale bar: 20  $\mu\text{m}$ .

experiments also showed that  $\beta 1$ -expressing cells in the pre- and postnatal ventricular zone expressed the stem and precursor cell marker nestin (Fig. 1H-K,L-N), but not the polysialated isoform of NCAM (PSA-NCAM) seen on precursor cells (not shown), from which we conclude that at least some of these  $\beta 1$ -expressing cells are neural stem cells.

To determine whether extracellular matrix ligands for  $\beta 1$  integrins were present in the stem cell-containing regions we examined the expression of laminins and fibronectin by immunohistochemistry. Laminin distribution was determined using a polyclonal antibody against all three chains of laminin 1 and a second antibody against the laminin  $\alpha 2$  chain present in laminins 2, 4 and 12. In E12.5 mouse and E15.5 rat, we found expression of laminin  $\alpha 2$  in the ventricular region, being strongest immediately adjacent to the ventricle (Fig. 2C), where we had also observed expression of the  $\alpha 6\beta 1$  integrin laminin receptor (Fig. 1). This expression pattern contrasted with that seen for laminin 1, which was found mainly around the blood vessels (Fig. 2B), and for fibronectin, which was present at low levels in a speckled pattern throughout the ventricular and subventricular regions (Fig. 2A). In the postnatal CNS of both mouse (not shown) and rat (Fig. 2D-F) the expression of laminin  $\alpha 2$  was less, although still detectable, whereas the expression patterns of fibronectin and laminin 1 remained similar to those seen at E12.5 and E15.5.

### $\beta 1$ integrin and ECM expression in sectioned neurospheres

The location of high- $\beta 1$ -expressing cells reported above corresponds to that described for neural stem cells within the SVZ of the postnatal CNS, as detected by cell proliferation studies (Craig et al., 1996; Morshead et al., 1998). To determine the relationship between  $\beta 1$  expression and neural stem cells in more detail, we used a three-dimensional culture technique in which neural cells are plated at clonal density on non-adherent substrates in the presence of FGF2 and/or EGF.

In these cultures some of the cells form spheres (neurospheres) which, when dissociated and replated at clonal density, will form new spheres. Following each such passage, cells within the spheres can differentiate into neurones, astrocytes or oligodendrocytes, confirming that the sphere-forming cells represent neural stem cells (Reynolds and Weiss, 1992; Reynolds and Weiss, 1996). Each sphere therefore represents a mixture of stem and committed precursor cells that arise from a single stem cell. We reasoned that these spheres were likely to develop a three dimensional architecture in which stem and precursor cells separate, as seen in the intact embryonic CNS. If so, and if cells expressing high levels of  $\beta 1$  integrin represent a stem cell population, then it follows that these cells will be spatially distinct from those expressing markers of differentiation and will be present in areas of the sphere expressing stem cell markers.

To test these predictions we cut cryostat sections of intact neurospheres and immunostained them with anti- $\beta 1$  integrin antibodies. These experiments showed that, for spheres prepared from either rat or mouse, cells expressing high levels of  $\beta 1$  were present only on the edge of the sphere (Fig. 3A,B). We then compared this distribution with that of a stem and early precursor cell marker (the intermediate filament protein nestin, Fig. 3B,C) and with that of markers of committed precursor cells for neurones ( $\beta 3$  tubulin, Fig. 3F) and astrocytes (GFAP, Fig. 3D,E). Nestin<sup>+</sup> cells were present around the edge of the sphere within the population expressing high levels of  $\beta 1$  integrin (Fig. 3B), whereas the differentiation markers were mainly present inside the sphere (Fig. 3D-F), demonstrating the separation of stem cell and committed precursor populations.

An important feature of the architecture of the intact CNS is that the proliferating stem cell population is distinct from the newly-differentiated post-mitotic neurones present in more superficial regions of the cortex. This is illustrated by a separation of phosphorylated histone H3 or BrdU labelling (both of which identify dividing cells) and  $\beta 3$  tubulin expression (a marker of neuronal differentiation) in the embryonic ventricular region (as shown in Fig. 3G-I). To determine whether the same distinction was also present in neurospheres, the spheres were exposed to short pulses (30 minutes) of BrdU before fixation and sectioning. BrdU incorporation was seen only in cells at the edge of the sphere. These cells did not express markers of neuronal differentiation (Fig. 3K), which were present only in central regions of the sphere, but did express the EGF receptor (Fig. 3L), present on neural stem cells grown in FGF (Lillien and Raphael, 2000). With longer pulses of BrdU (3 and 24 hours) labelled cells were seen further towards the centre of the sphere (not shown)

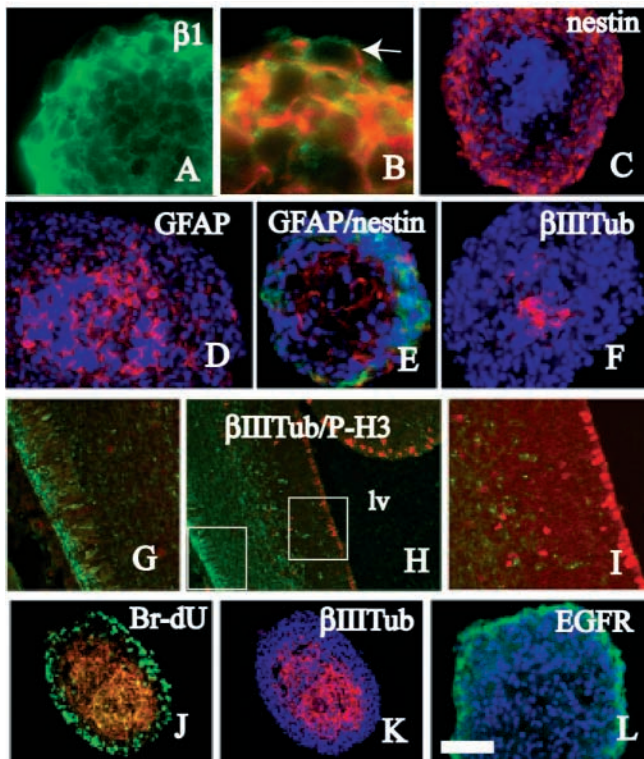

**Fig. 3.** The three-dimensional structure of the neurospheres compared with the developing neuroepithelium. (A) Expression of  $\beta 1$  on 14  $\mu\text{m}$  cryostat sections of neurospheres grown in EGF from P0 rat pups. Note that high- $\beta 1$ -expressing cells are present at the edge of the spheres. (B) Co-labelling of high- $\beta 1$ -expressing cells (green) with anti-nestin antibodies (red) is seen at the edge of the neurosphere. (C) The cells in the centre of the neurosphere, shown by DAPI staining (blue), do not stain for nestin (red). Expression of GFAP (D, red), nestin/GFAP (E, green and red, respectively) and  $\beta 3$  tubulin (F, red) in neurospheres grown from P0 rat pups shows that differentiated cells are present mostly in the center. Nuclei are counterstained with DAPI (blue). Proliferation in the developing VZ and in the neurospheres is shown in panels G-K. In the E15.5 developing rat brain, cells divide in the VZ, as shown by the expression of phosphorylated histone H3 (P-H3, red; H,I), whereas  $\beta 3$  tubulin<sup>+</sup> cells (green; H,G) do not express P-H3. (G,I) Higher magnification views of the  $\beta 3$  tubulin<sup>+</sup> region (G) and the phosphorylated histone H3<sup>+</sup> region (I) seen in H, as indicated by the boxes. Likewise in the neurospheres BrdU incorporation (green nuclei, J) occurs at the periphery only, and not in the postmitotic  $\beta 3$  tubulin<sup>+</sup> cells in the centre (red cells, K). Note that the yellow (non nuclear) staining seen in the centre of the sphere is due to background. (L) The cells at the edge of the sphere express the EGF receptor. In K and L nuclei are counterstained with DAPI (blue). Scale bar: 15  $\mu\text{m}$  in B; 20  $\mu\text{m}$  in A; 25  $\mu\text{m}$  in C-G,L,I; 30  $\mu\text{m}$  in J,K; 40  $\mu\text{m}$  in H.

and the labelling index increased from 12% with a 30-minute exposure to 24% and 49% for a 3- and 24-hour exposure to BrdU, respectively. Interestingly the figures of 12 and 24% for the 30-minute and 3-hour exposure to BrdU are in keeping with the figure of 18.5% established for in vivo BrdU incorporation in the VZ/SVZ of E14 embryos exposed to BrdU for 35-40 minutes (Miyata et al., 2001). The appearance of labelled cells within the centre of the sphere is consistent with the differentiation of precursors that have arisen from dividing

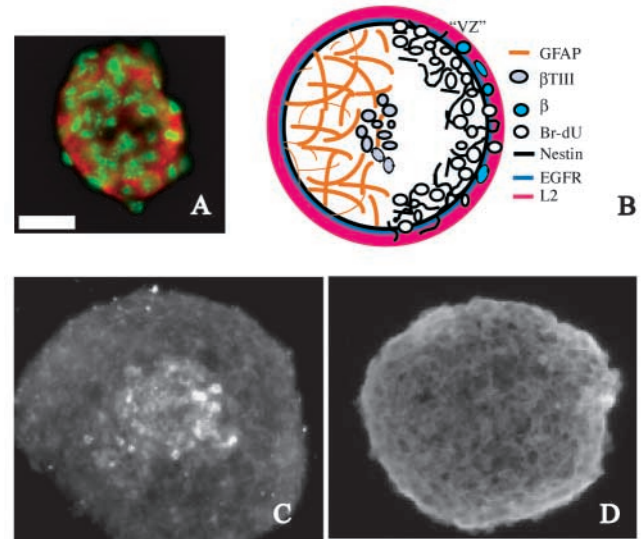

**Fig. 4.** Expression of ECM molecules on neurospheres. (A) Laminin  $\alpha 2$  chain (red) is highly expressed at the edge of neurospheres. Nuclei are counterstained with DAPI (green). (B) A model of the neurosphere three-dimensional structure, summarizing the data presented and showing how nestin, EGF receptor (EGFR),  $\beta 1$  integrin ( $\beta$ ) and laminin  $\alpha 2$  (L2) are found in the same region. Note that, for clarity, the GFAP distributed throughout the centre of the sphere is only shown on the left side of the model, whereas the nestin and BrdU labelling around the perimeter of the entire sphere is only shown on the right side. (C,D) In the sectioned neurospheres laminin 1 is found in the center (C), whereas laminin  $\alpha 2$  predominates at the edge (A,D). Scale bar: 20  $\mu\text{m}$ .

stem cells as the sphere expands by division of cells around the edge. Division of cells at the periphery of the neurospheres was also detected using antibodies against phosphorylated histone H3 (data not shown), confirming the results obtained with BrdU.

Just as in the intact developing CNS, we found that laminin  $\alpha 2$  was present in the region containing the cells that express high levels of  $\beta 1$  (Fig. 4A,D). Laminin 1, by contrast, was expressed in the central regions of the sphere (Fig. 4C), and fibronectin was diffusely localised in a speckled pattern (not shown) similar to that seen in the intact CNS. Together, these observations reveal a distribution of the different molecules within the sphere that mirrors that seen in the intact CNS; the three-dimensional structure of the spheres is summarised in Fig. 4B.

If stem cells are present around the edge of the neurosphere, then changes in growth factor receptor expression normally seen in these cells in vivo should also be observed in this region. To test this prediction, we took advantage of the observation that FGF2 promotes the upregulation of the EGF receptor in neural stem cells (Lillien and Raphael, 2000). In confirmation of these results, when spheres grown in EGF alone were sectioned and immunolabelled with anti-EGF receptor antibodies, they showed low but distinct labelling at the edges of the spheres in the region shown above to contain the EGF receptor-expressing cells (Fig. 5A). However, spheres grown in FGF2 showed much higher levels of EGF receptor expression at the edge of the sphere (Fig. 5B), once again in the region containing the high- $\beta 1$ -expressing cells. We also

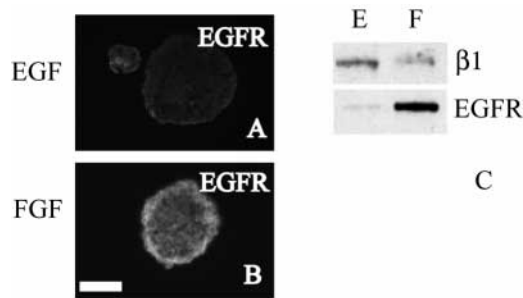

**Fig. 5.** Expression of EGF receptor in neurospheres. Sections of mouse neurospheres grown from P0 pups in EGF (A) or FGF2 (B). There is a greater expression of EGF receptor in the neurospheres grown in FGF2 (compare A and B). This is confirmed by western blotting using an anti-EGF receptor antibody, as shown in C. Note also the increased expression of  $\beta 1$  in spheres grown in EGF (lane E) when compared with spheres grown in FGF2 (lane F). Scale bar: 40  $\mu\text{m}$  for A,B.

obtained increased levels of EGF receptor expression in FGF2 treated spheres when analysed by western blotting (Fig. 5C). Taken together, we conclude from these results that neurospheres do have a distinct three-dimensional architecture with the stem cell population around the edge, in a region containing laminin  $\alpha 2$  and  $\beta 1$  integrin-expressing cells, as observed in the intact developing CNS, whereas the more differentiated cells lie within the central regions of the sphere.

### Neurosphere formation by cells expressing high or intermediate levels of $\beta 1$ integrin

If the cells around the edge of the neurospheres expressing high levels of  $\beta 1$  are neural stem cells, then we would predict that these cells will be more likely to form neurospheres [which derive from a single stem cell in clonal density cultures (Reynolds and Weiss, 1996)] than cells expressing lower levels of  $\beta 1$  integrin. To test this predicted relationship between  $\beta 1$ -expressing cells and neurosphere formation, we performed immunofluorescent labelling experiments and FACS analysis on dissociated neurosphere cells grown in either FGF2 or EGF. As expected from the immunofluorescent pattern seen in the sectioned neurospheres, antibody labelling of cells dissociated from neurospheres revealed the presence of a small subpopulation of cells expressing higher levels of  $\beta 1$  integrin (Fig. 6A,B). The FACS profiles confirmed the presence of cells expressing high levels of  $\beta 1$ , and also revealed that  $\beta 1$  expression levels were higher in the EGF-grown spheres than those grown in FGF2 (also shown by western blotting of neurosphere lysates, as shown in Fig. 5). To examine neurosphere formation potential, we selected a defined number of cells from the population comprising the 5% of cells with the greatest levels of expression (boxes 1 and 3 in Fig. 6C and D, respectively) and carried out neurosphere-forming assays to measure the number of stem cells by plating the cells at low density (4000 cells/cm<sup>2</sup>). For comparison, the same number of cells were selected from the population expressing intermediate levels of  $\beta 1$  (boxes 2 and 4 in Fig. 6C and D, respectively) and were grown in each condition. There were no significant differences in the viability of the cell populations immediately after sorting, as assessed by trypan blue exclusion (EGF: high  $\beta 1$  expression  $5.6 \pm 3.7\%$ ; intermediate

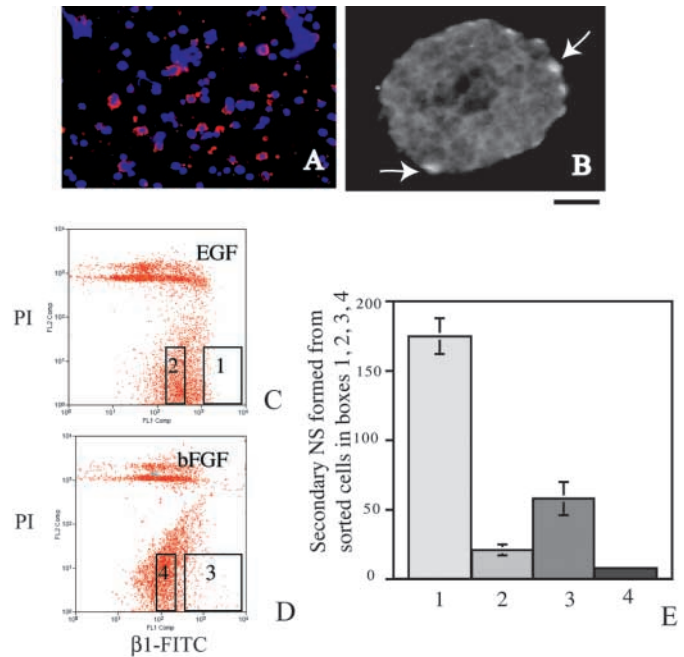

**Fig. 6.** Cells expressing high levels of  $\beta 1$  generate more neurospheres. Dissociated (A) and intact (B) neurospheres stained for  $\beta 1$  (red in A, arrow in B). Note the presence of a cell population expressing high levels of  $\beta 1$ . Nuclei in A were counterstained with DAPI (blue). (C) Neurospheres grown in EGF were dissociated, labelled with a monoclonal anti- $\beta 1$  antibody conjugated with FITC and sorted into two groups – high expressers (box 1) and moderate expressers (box 2) – as discussed in the text. (D) Neurospheres grown in FGF2 were dissociated, labelled with a monoclonal anti- $\beta 1$  antibody conjugated with FITC and sorted into two groups – high expressers (box 3) and moderate expressers (box 4) as above. (E) Graph showing the number of secondary neurospheres formed from the sorted cell populations after one week in culture. The differences between both 1 and 2 (high and moderate  $\beta 1$  expressers in EGF), and between 3 and 4 (high and moderate  $\beta 1$  expressers in FGF2), are statistically significant ( $P < 0.001$ ). Scale bar: 20  $\mu\text{m}$  for A,B.

$\beta 1$  expression,  $7.55 \pm 2.15\%$ . FGF:  $6.35 \pm 0.75\%$  and  $7.25 \pm 2.55\%$ , respectively). However significantly more spheres formed from the high  $\beta 1$ -expressing population after one week in culture in either growth factor (Fig. 6E), confirming that cells in this population have a higher probability of behaving like neural stem cells than cells expressing intermediate levels of  $\beta 1$  integrin. Both groups, however, showed a higher potential to form spheres than unselected cell populations also containing cells expressing low levels of  $\beta 1$  integrin. In two separate experiments in which we compared the sphere forming potential of high- $\beta 1$ -expressing and intermediate- $\beta 1$ -expressing cells with the whole (ungated) population (after exclusion of non-viable cells as described in Materials and methods, and as illustrated in the supplementary figure, see Fig. S1 at <http://dev.biologists.org/supplemental>), we found that in EGF high- $\beta 1$ -expressing cells formed 12 times more spheres than the ungated group. Likewise, EGF-grown intermediate- $\beta 1$ -expressing cells generated four times more secondary spheres than the ungated group. For FGF-grown spheres, high- $\beta 1$ -expressing cells generated five times more spheres than the ungated population

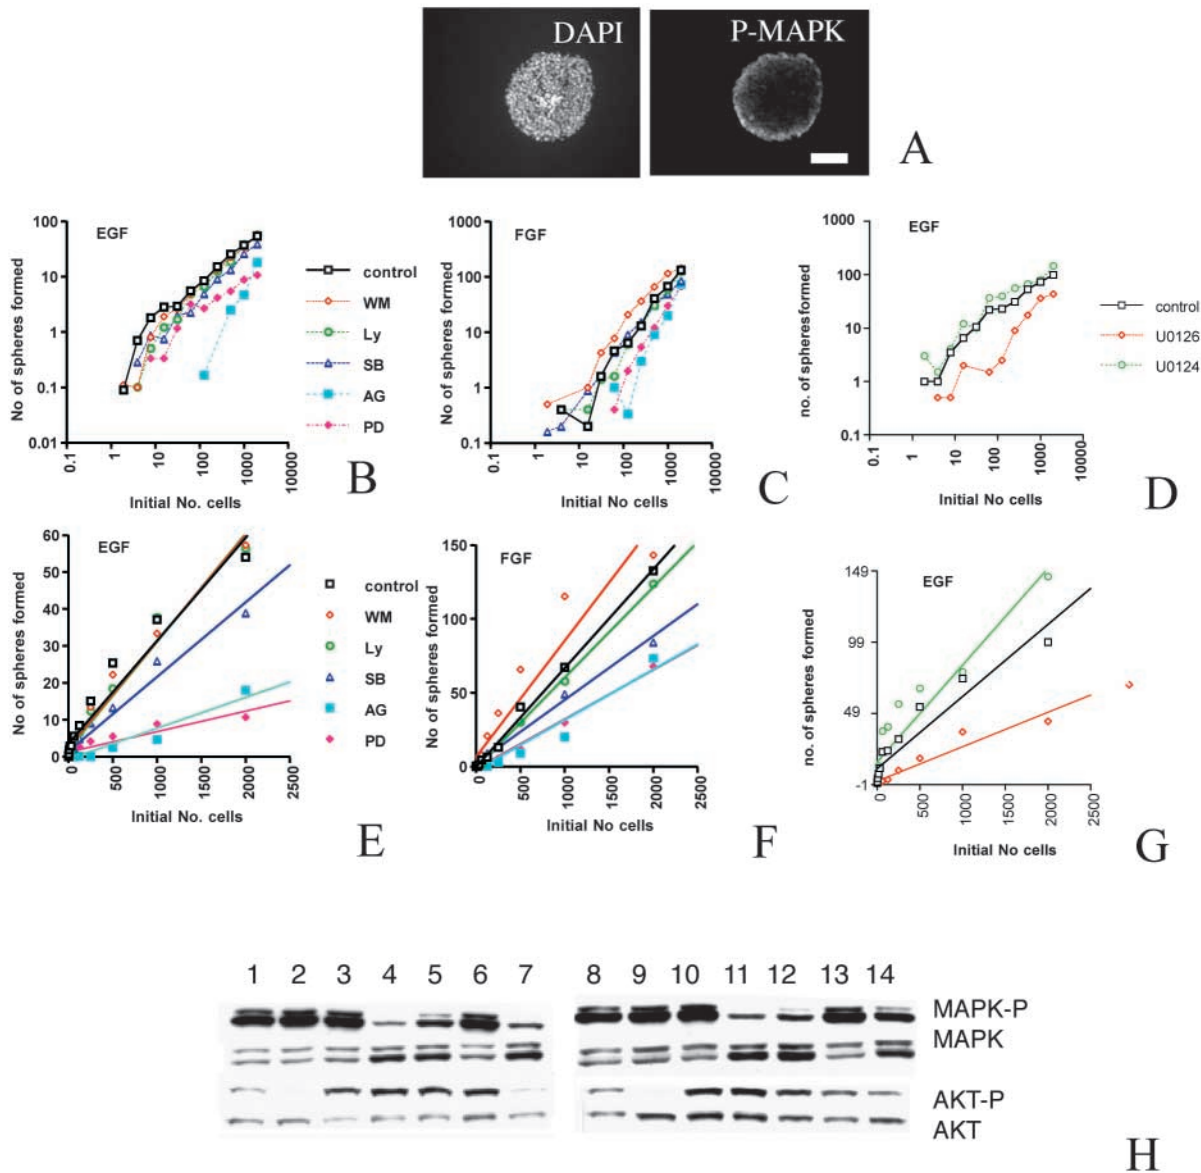

**Fig. 7.** Effects of blocking MAPK on neural stem cell maintenance. (A) Phosphorylated MAPK expression and DAPI labelling of a sectioned neurosphere grown from P0 rat brain. Note the peripheral location of the P-MAPK labelling. Scale bar: 40  $\mu\text{m}$ . (B-G) A decrease in neurosphere formation is seen in serial dilution assays in the presence of blockers for MAPK (PD98059). B shows the entire dilution series in a single experiment for cells grown in EGF plotted on a log-log scale, whereas E shows the same dilution series with linear scales and the regression lines from the data. C and F show the same data for cells grown in FGF. Note that, as expected, the EGF receptor inhibitor AG1478 also inhibits neurosphere formation at all dilutions in EGF. Blockers of MAPK38 (SB203580) and PI3 kinase (wortmannin and LY294002) do not show any effect on neurosphere formation. PD, PD98059; AG, AG1478; WM, wortmannin; Ly, LY294002; SB, SB203580. D and G show the effect of the MEK inhibitor U0126 on cells grown in EGF, as compared with the control U0124 or untreated cells. Note that inhibition of sphere formation is also seen with this inhibitor. The efficacy of the inhibitors is shown in the western blots (H). Lanes 1-6 and 8-13 show cells grown in EGF and FGF, respectively, and exposed to LY294002 (lanes 1, 8), wortmannin (lanes 2, 9), U0124 (lanes 3, 10), U0126 (lanes 4, 11) or PD98059 (lanes 5, 12), or grown without inhibitors (lanes 6, 13). Lanes 7 and 14 show cells starved of growth factors prior to analysis. Note that growth factor deprivation reduces phosphorylation of both MAPK and Akt (compare lanes 6, 7 and 13, 14). PD98059 and U0126 reduce only MAPK phosphorylation, whereas wortmannin and LY294002 reduce only Akt phosphorylation.

and the intermediate- $\beta 1$ -expressing cells generated 3.4 times more neurospheres than the ungated population.

### A MAPK signalling pathway is essential to neural stem cell maintenance

The demonstration that EGF receptor expression and  $\beta 1$  integrin co-distribute at the edge of the neurospheres raises the

possibility that shared downstream signalling molecules might be important in the regulation of neural stem cell behaviour. One candidate is MAPK, shown to play a role in the maintenance of the human skin stem cells (Zhu et al., 1999). To determine whether MAPK is activated in neural stem cells, we immunolabelled neurosphere sections with an antibody against phosphorylated MAPK. Bright labelling was seen only

at the edge of the sphere with cells grown in either FGF2 or EGF alone (Fig. 7A). Activated MAPK was also observed by western blotting lysates prepared from the neurospheres (not shown, but see Fig. 8). In order to establish the role of MAPK signalling in neural stem cell maintenance we used pharmacological inhibitors. To quantify the effects of these inhibitors we used serial dilutions assays rather than plating cells at low density. In these assays, a fixed number of cells was progressively diluted in adjacent wells of a 96-well plate, and the number of spheres that formed in each well was counted in the presence of inhibitors of p42,44 MAPK, p38 MAPK, PI3K or the EGF receptor. The very low plating density in the high dilution wells ensures that spheres represent growth from a single cell and not an aggregation of cells. As shown in Fig. 7, log-log plots of the data from individual experiments confirmed that, for all dilutions at which one or more spheres form, the relationship between the number of cells plated and the number of spheres formed was constant, as evidenced by the straight line in the graph. We conclude from this that the ability of the stem cells to form spheres is independent of plating density and that regression lines calculated from the linear plots accurately reflect cell behaviour at all densities. The validity of the regression lines to represent the data from these assays is confirmed by  $R^2$  values of  $>0.85$  for all experimental conditions. When neurospheres were dissociated and cells were replated in the serial dilution assay in the presence of the MAPK p42,44 pathway inhibitor PD98059, and grown in either FGF2 or EGF, a reduction in the number of cells able to form new neurospheres was seen, as evidenced by the reduced slope shown in Fig. 7E,F. For cells grown in EGF alone the mean slope of the regression lines from three experiments was  $0.028 \pm 0.002$  (mean  $\pm$  s.e.m.,  $R^2=0.94$ ,  $n=11$ ), as compared with  $0.006 \pm 0.001$  ( $R^2=0.855$ ) for cells grown in EGF and PD98059 ( $P<0.001$ ,  $n=6$ ). For cells grown in FGF2 the values were  $0.05 \pm 0.01$  ( $R^2=0.99$ ) and  $0.016 \pm 0.011$  ( $R^2=0.99$ ), respectively ( $P<0.05$ ,  $n=5$ ). For cells grown in EGF, the EGF receptor inhibitor decreased sphere formation ( $0.01 \pm 0.003$ ,  $R^2=0.94$ ,  $P<0.001$ ,  $n=6$ ) but this inhibitor had a much smaller, although still significant, effect on cells grown in FGF2 ( $0.03 \pm 0.005$ ,  $R^2=0.95$ ,  $P<0.05$ ,  $n=3$ ). Inhibitors of PI3K (wortmannin, LY294002) or p38 MAPK (SB203580) had no effect on sphere formation (Fig. 7). A significant reduction was also observed in separate experiments when the cells were exposed to another MAPK p42,44 pathway inhibitor, U0216 (EGF,  $0.05 \pm 0.021$ ; EGF + U0216,  $0.024 \pm 0.012$ ;  $n=2$ ,  $P<0.05$ ), whereas the control U0124 compound had no effect (Fig. 7). The results with the PI3K inhibitors suggest that the reduction in sphere formation seen in the presence of MAPK inhibition does not simply reflect perturbation of signalling pathways required for proliferation and sphere formation, as the increased proliferation seen in neurospheres derived from  $PTEN^{-/-}$  mice demonstrates a role for PI3K in neural stem/precursor cell proliferation (Groszer et al., 2001).

### $\beta 1$ integrins activate MAPK in neural stem cells

Having established (1) that  $\beta 1$  integrins are expressed at a high level on neural stem cells, (2) that at least one extracellular ligand (laminin  $\alpha 2$  chain containing laminins) is present in the stem cell-containing regions of the developing CNS, and (3) that MAPK signalling is required for stem cell maintenance,

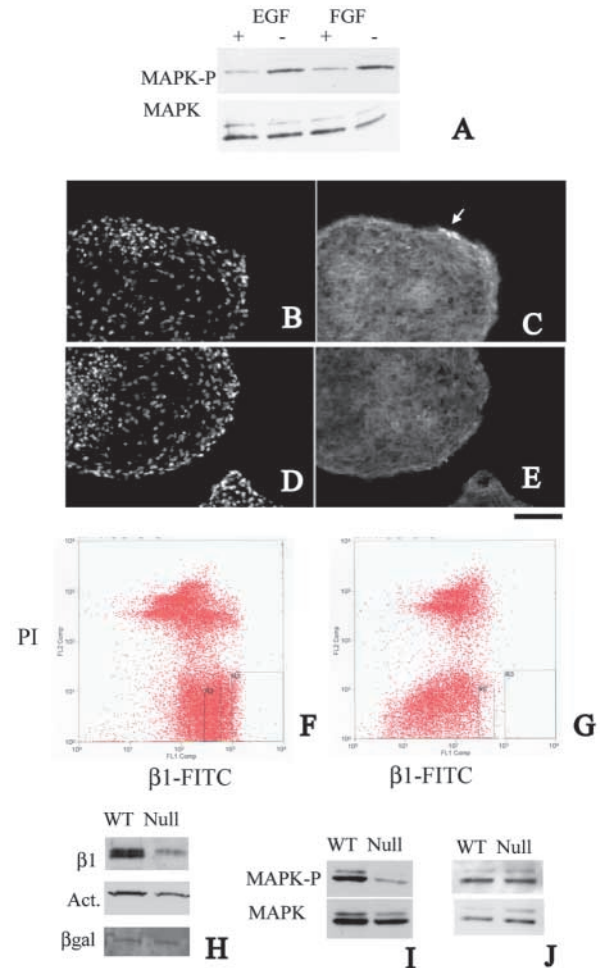

**Fig. 8.** MAPK is regulated by  $\beta 1$  integrin. (A) Western blots show that activation of MAPK by both EGF and FGF2 is reduced by a monoclonal anti- $\beta 1$  blocking antibody (Ha2/5). Addition of the antibody is indicated by '+', absence by '-'. The lower panel shows expression of total MAPK (ERK1 and ERK2), confirming equivalent levels in the different lysates. (B-E)  $\beta 1$  Staining of 14  $\mu$ m cryostat sections of floxed  $\beta 1$ /wt (B,C) and floxed  $\beta 1$ /null (D,E) neurospheres exposed to cre recombinase. Note that cells at the edge of the sphere still express high levels of  $\beta 1$  in the floxed  $\beta 1$ /wt sphere (C, arrow) in contrast to the floxed  $\beta 1$ /null spheres (D,E). Note also that the negative controls (omitting the anti- $\beta 1$  antibody) show no staining (data not shown). The weaker labelling in the center of the spheres therefore most likely represents low levels of  $\beta 1$  expression on more differentiated and non-mitotic cells, which is also reduced in the floxed  $\beta 1$ /null neurospheres exposed to cre recombinase. The decrease in  $\beta 1$  expression was confirmed in the neurosphere cells by flow cytometry (F,G), which reveals a shift to the left (decrease) of the  $\beta 1$  levels in the floxed  $\beta 1$ /null spheres (G) when compared with the floxed  $\beta 1$ /wt (F), following cre exposure. (H) Western blot of lysates from floxed  $\beta 1$ /wt (left) and floxed  $\beta 1$ /null (right) neurospheres showing the decrease of  $\beta 1$  in the null cells (top lanes). The middle panels show levels of actin, confirming equal loading, whereas the lower panels show expression of  $\beta$ -galactosidase, thus confirming excision of the floxed allele as discussed in the text. (I) In cre-exposed neurospheres, MAPK phosphorylation is considerably reduced in the floxed  $\beta 1$ /null (right) neurospheres, whereas total MAPK is maintained. After several passages, however, MAPK phosphorylation is the same in the floxed  $\beta 1$ /wt (left) and floxed  $\beta 1$ /null (right) neurospheres (J). WT, floxed  $\beta 1$ /wt; Null, floxed  $\beta 1$ /null. Scale bar: 20  $\mu$ m for B-E.



we next investigated whether  $\beta 1$  integrin signalling activated MAPK in neural stem cells. To do this, we used blocking antibodies and genetic techniques. For the blocking antibody studies, we compared the intensity of the phosphorylated MAPK band in western blotting experiments with or without a monoclonal anti- $\beta 1$  integrin-blocking antibody present in the neurosphere culture medium. These experiments showed a partial inhibition of the phosphorylation of MAPK in spheres grown in both FGF2 and EGF (Fig. 8A), demonstrating a role for  $\beta 1$  integrins in MAPK signalling.

For the genetic studies, we used cre/lox technology to remove the  $\beta 1$  gene from neurosphere cells and determine the effect on MAPK activation. This technology has been used previously to excise  $\beta 1$  integrin efficiently from chondrocytes (Iba et al., 2000). Mice containing a floxed  $\beta 1$  allele (Fassler and Meyer, 1995; Brakebusch et al., 2000) generated by homologous recombination were bred with heterozygous  $\beta 1$ -null mice to generate animals in which the second allele was either  $\beta 1$ -null or wild type. Neurosphere cultures were prepared from these animals and grown in EGF and FGF2. The spheres were dissociated, replated at a density of 10 cells/ $\mu$ l and exposed to an adenoviral vector expressing cre recombinase. Excision of the floxed  $\beta 1$  gene was confirmed by the activation of a reporter *lacZ* gene inserted downstream of the  $\beta 1$  allele, which is activated only following excision of the  $\beta 1$  sequence (Brakebusch et al., 2000; Potocnik et al., 2000). Spheres derived from stem cells in which excision had occurred could be identified by the presence of  $\beta$ -galactosidase staining in all cells. The reduction in  $\beta 1$  integrin following excision was confirmed in three ways. First, neurospheres exposed to the adenoviral vector but not yet dissociated and replated were sectioned as above and immunolabelled with anti- $\beta 1$  antibodies. Second, lysates from treated and control spheres were used in western blotting experiments. Third, FACS analysis was performed to detect changes in the level of  $\beta 1$  expression. As shown in Fig. 8, following gene excision we observed a reduction in  $\beta 1$  integrin immunolabelling around the edge of the spheres (Fig. 8B-E), a reduction in  $\beta 1$ -labelling levels in the FACS analysis (Fig. 8F,G) and a reduction in the intensity of the  $\beta 1$  integrin band, as revealed by western blotting (Fig. 8H). Having confirmed the excision procedure, we next performed western blotting experiments using antibodies against phosphorylated MAPK. These showed a reduction in MAPK activation in primary neurospheres exposed to the cre-expressing adenovirus (Fig. 8I). However, subsequent passages of the  $\beta 1$ -excised spheres showed normal levels of activated MAPK (Fig. 8J, Fig. 9), even though the presence of  $\beta$ -galactosidase in these spheres and a shift to the left in the FACS analysis of  $\beta 1$  expression confirmed that these spheres derived from cells in which gene excision had occurred (data not shown). We also counted the number of neurospheres that formed when these cells were plated at low density. No differences were seen in the number of spheres in these assays, or when secondary and subsequent passaging of the spheres was performed.

We reasoned that an alternative signalling pathway could be responsible for the lack of any sustained effect of  $\beta 1$  excision on the levels of activated MAPK. As the EGF receptor is known to activate MAPK (Schlessinger, 2000) in neural stem cells (Learish et al., 2000), and because we observed reciprocity between the levels of  $\beta 1$  and EGF receptor (Fig. 5)

in neurospheres, it is possible that upregulated growth factor signalling via MAPK can compensate for the loss of  $\beta 1$ . To test this hypothesis we added the EGF receptor inhibitor AG1478 to lox $\beta 1$ /null and lox $\beta 1$ /wt neurospheres grown in EGF and FGF after exposure to the adenoviral cre vector. We predicted that this would expose upregulation of EGF signalling in response to the loss of  $\beta 1$ , by revealing a greater decrease in MAPK activation in the  $\beta 1$ -excised cells than in cells expressing  $\beta 1$  following EGF receptor inhibition. We therefore established three neurosphere cell lines from different lox $\beta 1$ /null and lox $\beta 1$ /wt mice.

Each line was passaged at least ten times following cre-mediated excision, by which time MAPK levels had returned to the levels seen in the  $\beta 1$ -expressing spheres (Fig. 8J). After an overnight exposure to the inhibitor, levels of total MAPK and phosphorylated MAPK (P-MAPK) were analysed by western blotting (Fig. 9A,B). A marked decrease in P-MAPK was observed in the  $\beta 1$ -excised cells, in contrast to the  $\beta 1$ -expressing cells (Fig. 9A,B). Analysis of all six lines showed a significant reduction in the P-MAPK/total MAPK ratio in the  $\beta 1$ -excised cells ( $1.05 \pm 0.08$  to  $0.84 \pm 0.01$  in the presence of AG1478,  $P=0.005$ ), but no significant reduction in the  $\beta 1$ -expressing cells ( $1.22 \pm 0.15$  to  $1.23 \pm 0.22$  in the presence of AG1478), consistent with an increased dependence of MAPK activation on EGF signalling in the  $\beta 1$ -deficient cells, and suggesting that upregulation of growth factor signalling contributes to the compensation for the loss of  $\beta 1$  integrin. The lack of viability and absence of any sphere formation when cells were grown at high dilutions in the presence of the EGF receptor inhibitor (Fig. 7D) prevents the comparison of the  $\beta 1$ -expressing and  $\beta 1$ -deficient cells grown in EGF required to analyse whether this compensatory upregulation is associated with an increased dependence on EGF signalling for maintenance. However maintenance in the presence of FGF2 was not altered by the addition of the inhibitor to  $\beta 1$ -excised cells (data not shown), showing that self-renewal in response to other growth factors was not reduced.

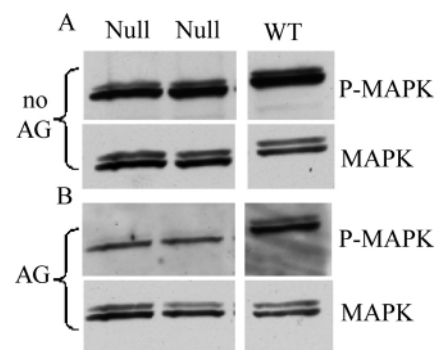

**Fig. 9.** (A) Western blot of lysates from floxed  $\beta 1$ /wt (right lane) and floxed  $\beta 1$ /null (left two lanes) neurospheres after more than ten passages, showing that MAPK is phosphorylated equally in both groups. (B) Western blot of lysates from floxed  $\beta 1$ /wt (right) and floxed  $\beta 1$ /null (left) neurospheres (the same cultures as in A) exposed to AG1478 (20  $\mu$ M), an inhibitor of the EGF receptor. This panel shows that MAPK phosphorylation is reduced to a greater extent in the null spheres (floxed  $\beta 1$ /null) than in the floxed  $\beta 1$ /wt in the presence of the inhibitor. AG, AG1478. WT represents floxed  $\beta 1$ /wt and Null represents floxed  $\beta 1$ /null spheres following exposure to cre recombinase.

## Discussion

In the present work we have made the following principal observations. First, laminins and fibronectin are expressed in different locations of the embryonic and postnatal germinal neuroepithelium. The distribution of laminin  $\alpha 2$  present in laminins 2, 4 and 12 corresponds to the region immediately adjacent to the ventricle (the ventricular and subventricular zones) containing the neural stem cells. Second,  $\beta 1$  integrin is also highly expressed by cells in the ventricular region of the embryonic CNS, and by a subpopulation of cells in this region of the postnatal CNS. Third, we have demonstrated a three-dimensional architecture of neurospheres with cells expressing nestin and the EGF receptor, both molecules present in neural stem cells, being found at the outside edge of the sphere. Both laminin  $\alpha 2$  and  $\beta 1$  integrin are highly expressed by cells in this region, with other ECM molecules present within the sphere rather than around the edge. Fourth, neurosphere cells expressing higher levels of  $\beta 1$  can be selected by FACS and will generate relatively more neurospheres than cells expressing lower levels of the integrin, so demonstrating stem cell properties. Fifth, we have shown, by using pharmacological inhibitors, that MAPK is required for neural stem cell self-renewal, as assessed by neurosphere generation. Finally, we have shown by antibody-blocking and genetic techniques that  $\beta 1$  integrin signalling activates MAPK, although the reduction observed in the blocking experiments is not sustained and is associated with a compensatory increase in growth factor signalling. Together these results indicate an important role for  $\beta 1$  integrin/extracellular matrix molecule interactions in the regulation of neural stem behaviour.

How might  $\beta 1$ /ECM interactions affect stem cell behaviour? Increased adhesion to niche ECM components could ensure that the cell is held in the niche and so exposed to other extracellular cues that instruct stem cell maintenance. One example of such extracellular cues is provided by the *Drosophila* protein Upd, which is secreted by hub cells in the testis and contributes to the maintenance of germline stem cells by activation of the JAK/STAT signalling pathway (Kiger et al., 2001). Upd binds to the extracellular matrix (Harrison et al., 1998) and previous studies using embryonic mosaics to examine the role of Upd in segmentation have noted that *upd* mutant cells could behave normally only when immediately adjacent to wild-type cells (Gergen and Wieschaus, 1986), suggesting a limited range of diffusion as a result of tethering to the matrix. Within the testis germ cell niche, the matrix could limit the range of Upd diffusion from the hub cell ensuring that only adjacent germline stem cells held in the niche by appropriate adhesion molecules respond to this signal.

In addition to a role in simply holding the stem cells within a niche, our results point to a direct signalling role for  $\beta 1$  integrins in neural stem cell regulation, as we have shown that self-renewal, or maintenance, in neural stem cells is partly regulated by  $\beta 1$  integrins and growth factors through a MAPK signalling pathway. A similar role for MAPK in stem cell maintenance has previously been described in human epidermal stem cells (Zhu et al., 1999). The interaction between integrin and growth factor signalling, well described in other cell types (Lee and Streuli, 1999; Renshaw et al., 1999; Byzova et al., 2000; Yamada and Even-Ram, 2002), provides a mechanism by which neural stem cell behaviour can be regulated by local ECM molecules, as well as by longer range

growth factor signals. Our results indicate a novel integrative role of MAPK that may be important in allowing populations of stem cells to change behaviour during development and repair in response to changes in the growth factor environment, while at the same time allowing individual stem cells to be fine tuned by their immediate microenvironment. Such signalling mechanisms with the potential for compensation between integrin and growth factor signalling pathways may also be operative in other stem cell types; for example, studies of haematopoietic stem cells in mice chimeric for  $\beta 1$  null cells show that  $\beta 1$  integrin is not required for stem cell maintenance, but is necessary for the homing of these cells to the liver (Hirsch et al., 1996).

The conclusion that  $\beta 1$  integrins regulate neural stem cell behaviour within the CNS niche leads us to question the nature of the ligands recognised by these integrins. One important group of candidates are the laminins, which are recognised by at least four  $\beta 1$  integrins,  $\alpha 1\beta 1$ ,  $\alpha 3\beta 1$ ,  $\alpha 6\beta 1$  and  $\alpha 7\beta 1$ .  $\alpha 6\beta 1$  expression has previously been shown in other stem cell systems (Shinohara et al., 1999; Xu et al., 2001), and in RT-PCR experiments we have found all four alpha subunits to be expressed in neural stem cells (J. Moore and C.ff.-C., unpublished). Laminins are expressed from the earliest stages of development, and have been shown to maintain human ES cells in an undifferentiated state (Xu et al., 2001). Proximity to a basement membrane is a feature of epithelial and germ cell niches, and transplantation experiments using reconstitution of spermatogenesis as an assay reveal that stem cells can be enriched from testis cell populations by selecting either for laminin binding or for expression of  $\beta 1$  or  $\alpha 6$  integrin subunits (Shinohara et al., 1999). In this paper, we have described the expression of the laminin  $\alpha 2$  chain in the developing germinal zone and also around the edge of the neurospheres in the regions containing the stem cell populations. Laminins containing this chain therefore provide a potential  $\beta 1$  integrin ligand for neural stem cells that is likely, by analogy with the ES cell and spermatogonial stem cell systems, to play a role in the control of neural stem cell behaviour. Furthermore, changes in the expression levels of laminin  $\alpha 2$  provide an additional mechanism for the regulation of neural stem cell behaviour. We observe a decline in laminin  $\alpha 2$  expression in the postnatal brain that may play an instructive role in the reduced level of proliferation within the germinal neuroepithelium at that time, as laminin can increase the proliferation of neuroepithelial cells (Drago et al., 1991a). Equally, the increase in laminin chain mRNAs seen within neuroepithelial cells exposed to bFGF may contribute to the mitogenic effects of the growth factor (Drago et al., 1991a; Drago et al., 1991b).

The importance of extrinsic signals in the regulation of stem cell behaviour is emphasized by the argument that, "rather than referring to a discrete cellular entity, a stem cell most accurately refers to a biological function" (Blau et al., 2001). Our results point to a complex interplay between integrin and growth factor signals in the germinal neuroepithelium being important regulators of this function, with MAPK being a key integrative signalling molecule. For future studies examining the developmental significance and therapeutic potential of these interactions, our work highlights the value of the analysis of neurosphere structure. The morphological observations described above suggest that neurospheres derived from postnatal brains can be used as a model for the

developing (midgestation) neuroepithelium. These spheres develop a three-dimensional structure that is remarkably similar in ECM composition and distribution of cellular phenotypes to the developing CNS. In particular the edge of the neurosphere is a complex niche, easily accessible and amenable to acute biochemical manipulation and analysis using inhibitors and blocking antibodies that will greatly facilitate further work.

We thank Nigel Miller (Department of Pathology, University of Cambridge) for technical support with the FACS, Dr Silvio Hemmi (University of Zurich) for help with the adenovirus, and Dr Verdon Taylor (Max-Planck Institute, Freiburg) for stimulating and helpful discussion. This study was supported by the Fifth Framework EC grant number QL3-CT-2000-30911 and by The Wellcome Trust (L.C., C.f.-C.), the National Competence Center in Research 'Neural Plasticity and Repair' and the Swiss National Science Foundation (D.P.L., J.B.R., U.S.), and the Max Planck Society and the Fonds der Chemischen Industrie (C.B., R.F.).

## References

- Blau, H. M., Brazelton, T. R. and Weimann, J. M. (2001). The evolving concept of a stem cell: entity or function? *Cell* **105**, 829-841.
- Brakebusch, C., Grose, R., Quondamatteo, F., Ramirez, A., Jorcano, J. L., Pirro, A., Svensson, M., Herken, R., Sasaki, T., Timpl, R., Werner, S. and Fassler, R. (2000). Skin and hair follicle integrity is crucially dependent on beta 1 integrin expression on keratinocytes. *EMBO J.* **19**, 3990-4003.
- Byzova, T. V., Goldman, C. K., Pampori, N., Thomas, K. A., Bett, A., Shattil, S. J. and Plow, E. F. (2000). A mechanism for modulation of cellular responses to VEGF: activation of the integrins. *Mol. Cell* **6**, 851-860.
- Craig, C. G., Tropepe, V., Morshead, C. M., Reynolds, B. A., Weiss, S. and van der Kooy, D. (1996). In vivo growth factor expansion of endogenous subependymal neural precursor cell populations in the adult mouse brain. *J. Neurosci.* **16**, 2649-2658.
- Decker, L., Durbec, P., Rougon, G. and Evercooren, A. B. (2002). Loss of polysialic residues accelerates CNS neural precursor differentiation in pathological conditions. *Mol. Cell. Neurosci.* **19**, 225-238.
- Doetsch, F., Caille, L., Lim, D. A., Garcia-Verdugo, J. M. and Alvarez-Buylla, A. (1999). Subventricular zone astrocytes are neural stem cells in the adult mammalian brain. *Cell* **97**, 703-716.
- Drago, J., Nurcombe, V. and Bartlett, P. F. (1991a). Laminin through its long arm E8 fragment promotes the proliferation and differentiation of murine neuroepithelial cells in vitro. *Exp. Cell Res.* **192**, 256-265.
- Drago, J., Nurcombe, V., Pearse, M. J., Murphy, M. and Bartlett, P. F. (1991b). Basic fibroblast growth factor upregulates steady-state levels of laminin B1 and B2 chain mRNA in cultured neuroepithelial cells. *Exp. Cell Res.* **196**, 246-254.
- Fassler, R. and Meyer, M. (1995). Consequences of lack of beta 1 integrin gene expression in mice. *Genes Dev.* **9**, 1896-1908.
- Gergen, P. and Wieschaus, E. (1986). Localized requirements for gene activity in segmentation of *Drosophila* embryos: analysis of *armadillo*, *fused*, *giant* and *unpaired* mutations in mosaic embryos. *Wilhelm Roux's Arch. Dev. Biol.* **195**, 49-62.
- Groszer, M., Erickson, R., Scripture-Adams, D. D., Lesche, R., Trumpp, A., Zack, J. A., Kornblum, H. I., Liu, X. and Wu, H. (2001). Negative regulation of neural stem/progenitor cell proliferation by the Pten tumor suppressor gene in vivo. *Science* **294**, 2186-2189.
- Harrison, D. A., McCoon, P. E., Binari, R., Gilman, M. and Perrimon, N. (1998). *Drosophila* unpaired encodes a secreted protein that activates the JAK signaling pathway. *Genes Dev.* **12**, 3252-3263.
- Hirsch, E., Iglesias, A., Potocnik, A. J., Hartmann, U. and Fassler, R. (1996). Impaired migration but not differentiation of haematopoietic stem cells in the absence of beta1 integrins. *Nature* **380**, 171-175.
- Hynes, R. O. (1992). Integrins: versatility, modulation, and signaling in cell adhesion. *Cell* **69**, 11-25.
- Iba, K., Albrechtsen, R., Gilpin, B., Frohlich, C., Loechel, F., Zolkiewska, A., Ishiguro, K., Kojima, T., Liu, W., Langford, J. K., Sanderson, R. D., Brakebusch, C., Fassler, R. and Wever, U. M. (2000). The cysteine-rich domain of human ADAM 12 supports cell adhesion through syndecans and triggers signaling events that lead to beta1 integrin-dependent cell spreading. *J. Cell Biol.* **149**, 1143-1156.
- Jacques, T. S., Relvas, J. B., Nishimura, S., Pytela, R., Edwards, G. M., Streuli, C. H. and French-Constant, C. (1998). Neural precursor cell chain migration and division are regulated through different beta1 integrins. *Development* **125**, 3167-3177.
- Jensen, U. B., Lowell, S. and Watt, F. M. (1999). The spatial relationship between stem cells and their progeny in the basal layer of human epidermis: a new view based on whole-mount labelling and lineage analysis. *Development* **126**, 2409-2418.
- Johansson, C. B., Momma, S., Clarke, D. L., Risling, M., Lendahl, U. and Frisen, J. (1999). Identification of a neural stem cell in the adult mammalian central nervous system. *Cell* **96**, 25-34.
- Kalamirides, M., Niwa-Kawakita, M., Leblais, H., Abramowski, V., Perricaudet, M., Janin, A., Thomas, G., Gutmann, D. H. and Giovannini, M. (2002). Nf2 gene inactivation in arachnoidal cells is rate-limiting for meningioma development in the mouse. *Genes Dev.* **16**, 1060-1065.
- Kiger, A. A., Jones, D. L., Schulz, C., Rogers, M. B. and Fuller, M. T. (2001). Stem cell self-renewal specified by JAK-STAT activation in response to a support cell cue. *Science* **294**, 2542-2545.
- Kilpatrick, T. J. and Bartlett, P. F. (1993). Cloning and growth of multipotential neural precursors: requirements for proliferation and differentiation. *Neuron* **10**, 255-265.
- Kintner, C. (2002). Neurogenesis in embryos and in adult neural stem cells. *J. Neurosci.* **22**, 639-643.
- Kondo, T. and Raff, M. (2000). Oligodendrocyte precursor cells reprogrammed to become multipotential CNS stem cells. *Science* **289**, 1754-1757.
- Lawson, K. A., Dunn, N. R., Roelen, B. A., Zeinstra, L. M., Davis, A. M., Wright, C. V., Korving, J. P. and Hogan, B. L. (1999). Bmp4 is required for the generation of primordial germ cells in the mouse embryo. *Genes Dev.* **13**, 424-436.
- Learish, R. D., Bruss, M. D. and Haak-Frendscho, M. (2000). Inhibition of mitogen-activated protein kinase kinase blocks proliferation of neural progenitor cells. *Brain Res. Dev. Brain Res.* **122**, 97-109.
- Lee, Y. J. and Streuli, C. H. (1999). Extracellular matrix selectively modulates the response of mammary epithelial cells to different soluble signaling ligands. *J. Biol. Chem.* **274**, 22401-22408.
- Lillien, L. and Raphael, H. (2000). BMP and FGF regulate the development of EGF-responsive neural progenitor cells. *Development* **127**, 4993-5005.
- Miyata, T., Kawaguchi, A., Okano, H. and Ogawa, M. (2001). Asymmetric inheritance of radial glial fibers by cortical neurons. *Neuron* **31**, 727-741.
- Morshead, C. M., Craig, C. G. and van der Kooy, D. (1998). In vivo clonal analyses reveal the properties of endogenous neural stem cell proliferation in the adult mammalian forebrain. *Development* **125**, 2251-2261.
- Nait-Oumesmar, B., Decker, L., Lachapelle, F., Avellana-Adalid, V., Bachelin, C. and Van Evercooren, A. B. (1999). Progenitor cells of the adult mouse subventricular zone proliferate, migrate and differentiate into oligodendrocytes after demyelination. *Eur. J. Neurosci.* **11**, 4357-4366.
- Potocnik, A. J., Brakebusch, C. and Fassler, R. (2000). Fetal and adult hematopoietic stem cells require beta1 integrin function for colonizing fetal liver, spleen, and bone marrow. *Immunity* **12**, 653-663.
- Raghavan, S., Bauer, C., Mundscha, G., Li, Q. and Fuchs, E. (2000). Conditional ablation of beta1 integrin in skin. Severe defects in epidermal proliferation, basement membrane formation, and hair follicle invagination. *J. Cell Biol.* **150**, 1149-1160.
- Renshaw, M. W., Price, L. S. and Schwartz, M. A. (1999). Focal adhesion kinase mediates the integrin signaling requirement for growth factor activation of MAP kinase. *J. Cell Biol.* **147**, 611-618.
- Reynolds, B. A. and Weiss, S. (1992). Generation of neurons and astrocytes from isolated cells of the adult mammalian central nervous system. *Science* **255**, 1707-1710.
- Reynolds, B. A. and Weiss, S. (1996). Clonal and population analyses demonstrate that an EGF-responsive mammalian embryonic CNS precursor is a stem cell. *Dev. Biol.* **175**, 1-13.
- Schlessinger, J. (2000). Cell signaling by receptor tyrosine kinases. *Cell* **103**, 211-225.

- Shinohara, T., Avarbock, M. R. and Brinster, R. L.** (1999). beta1- and alpha6-integrin are surface markers on mouse spermatogonial stem cells. *Proc. Natl. Acad. Sci. USA* **96**, 5504-5509.
- Spradling, A., Drummond-Barbosa, D. and Kai, T.** (2001). Stem cells find their niche. *Nature* **414**, 98-104.
- Suzuki, A., Zheng, Y., Kondo, R., Kusakabe, M., Takada, Y., Fukao, K., Nakauchi, H. and Taniguchi, H.** (2000). Flow-cytometric separation and enrichment of hepatic progenitor cells in the developing mouse liver. *Hepatology* **32**, 1230-1239.
- Svendsen, C. N., Fawcett, J. W., Bentlage, C. and Dunnett, S. B.** (1995). Increased survival of rat EGF-generated CNS precursor cells using B27 supplemented medium. *Exp. Brain Res.* **102**, 407-414.
- Watt, F. M. and Hogan, B. L.** (2000). Out of Eden: stem cells and their niches. *Science* **287**, 1427-1430.
- Xie, T. and Spradling, A. C.** (1998). decapentaplegic is essential for the maintenance and division of germline stem cells in the Drosophila ovary. *Cell* **94**, 251-260.
- Xu, C., Inokuma, M. S., Denham, J., Golds, K., Kundu, P., Gold, J. D. and Carpenter, M. K.** (2001). Feeder-free growth of undifferentiated human embryonic stem cells. *Nat. Biotechnol.* **19**, 971-974.
- Yamada, K. M. and Even-Ram, S.** (2002). Integrin regulation of growth factor receptors. *Nat. Cell Biol.* **4**, E75-E76.
- Ying, Y., Liu, X. M., Marble, A., Lawson, K. A. and Zhao, G. Q.** (2000). Requirement of Bmp8b for the generation of primordial germ cells in the mouse. *Mol. Endocrinol.* **14**, 1053-1063.
- Zhu, A. J., Haase, I. and Watt, F. M.** (1999). Signaling via beta1 integrins and mitogen-activated protein kinase determines human epidermal stem cell fate in vitro. *Proc. Natl. Acad. Sci. USA* **96**, 6728-6733.
